# Supplementary material for: Molecular Characterization of Imported and Autochthonous Dengue in Northeastern Spain
Source: MDPI journal article supplement (doi:10.3390/v13101910), 2021-09-23
Supplement: s1 [file s1]

Table S1. DENV sequences obtained in this study.

| Strain   | Serotype | Genotype       | Year | Country            | GenBank ID |
|----------|----------|----------------|------|--------------------|------------|
| HCBD1161 | 1        | I              | 2013 | Cambodia           | MZ520678   |
| HCBD1162 | 1        | I              | 2014 | French Polynesia   | MZ520679   |
| HCBD13N  | 1        | I              | 2015 | Sri Lanka          | MZ520688   |
| HCBD1303 | 1        | I              | 2017 | Myanmar            | MZ520684   |
| HCBD1375 | 1        | I              | 2017 | French Polynesia   | MZ520685   |
| HCBD1383 | 1        | I              | 2018 | Maldives           | MZ520687   |
| HCBD1426 | 1        | I              | 2018 | Thailand           | MZ520690   |
| HCBD1428 | 1        | I              | 2018 | Myanmar            | MZ520691   |
| HCBD1471 | 1        | I              | 2018 | Vietnam            | MZ520696   |
| HCBD1476 | 1        | I              | 2018 | Cambodia           | MZ520697   |
| HCBD1497 | 1        | I              | 2018 | The Philippines    | MZ520698   |
| HCBD1224 | 1        | I              | 2013 | WPR*               | MZ519975   |
| HCBD1223 | 1        | I              | 2013 | WPR/SEAR*          | MZ519976   |
| HCBD1425 | 1        | I              | 2018 | SEAR*              | MZ519972   |
| HCBD1559 | 1        | I              | 2018 | Vietnam            | MZ520699   |
| HCBD1760 | 1        | I              | 2018 | Spain              | MZ613343   |
| HCBD1382 | 1        | IV             | 2018 | The Philippines    | MZ520686   |
| HCBD1470 | 1        | IV             | 2018 | Vietnam            | MZ520694   |
| HCBD1469 | 1        | IV             | 2018 | The Philippines    | MZ520695   |
| HCBD1133 | 1        | V              | 2013 | India              | MZ520675   |
| HCBD1134 | 1        | V              | 2013 | Dominican Republic | MZ520676   |
| HCBD1160 | 1        | V              | 2013 | Dominican Republic | MZ520677   |
| HCBD185  | 1        | V              | 2013 | Dominican Republic | MZ520701   |
| HCBD1163 | 1        | V              | 2014 | Brazil             | MZ520680   |
| HCBD186  | 1        | V              | 2014 | Brazil             | MZ520702   |
| HCBD1225 | 1        | V              | 2015 | Costa Rica         | MZ520681   |
| HCBD1660 | 1        | V              | 2015 | Costa Rica         | MZ520700   |
| HCBD1226 | 1        | V              | 2016 | AMR*               | MZ519973   |
| HCBD1137 | 1        | V              | 2016 | AMR*               | MZ519974   |
| HCBD1474 | 1        | V              | 2017 | WPR/SEAR*          | MZ519971   |
| HCBD1286 | 1        | V              | 2017 | Mexico             | MZ520682   |
| HCBD1287 | 1        | V              | 2017 | India              | MZ520683   |
| HCBD1424 | 1        | V              | 2018 | Venezuela          | MZ520689   |
| HCBD1429 | 1        | V              | 2018 | Colombia           | MZ520692   |
| HCBD1467 | 1        | V              | 2018 | Colombia           | MZ520693   |
| HCBD22   | 2        | American-Asian | 2015 | El Salvador        | MH253297   |
| HCBD242  | 2        | American-Asian | 2016 | Dominican Republic | MZ520920   |
| HCBD244  | 2        | American-Asian | 2016 | Dominican Republic | MZ520923   |
| HCBD2348 | 2        | American-Asian | 2018 | Brazil             | MZ520915   |
| HCBD2432 | 2        | American-Asian | 2018 | Guatemala          | MZ520922   |
| HCBD2455 | 2        | American-Asian | 2018 | Cuba               | MZ520925   |
| HCBD2431 | 2        | American-Asian | 2018 | Cuba               | MZ540899   |
| HCBD2434 | 2        | American-Asian | 2018 | Cuba               | MZ540900   |
| HCBD223  | 2        | Asian I        | 2013 | Myanmar            | MZ520909   |
| HCBD229  | 2        | Asian I        | 2014 | Thailand           | MZ520912   |
| HCBD2663 | 2        | Asian I        | 2015 | Thailand           | MZ520927   |

|          |   |              |      |                    |          |
|----------|---|--------------|------|--------------------|----------|
| HCBD214  | 2 | Cosmopolitan | 2014 | Tanzania           | MZ520905 |
| HCBD225  | 2 | Cosmopolitan | 2014 | Indonesia          | MZ520910 |
| HCBD228  | 2 | Cosmopolitan | 2014 | Thailand           | MZ520911 |
| HCBD239  | 2 | Cosmopolitan | 2014 | The Philippines    | MZ520917 |
| HCBD240  | 2 | Cosmopolitan | 2014 | The Philippines    | MZ520918 |
| HCBD216  | 2 | Cosmopolitan | 2015 | Thailand           | MZ520906 |
| HCBD217  | 2 | Cosmopolitan | 2015 | Thailand           | MZ520907 |
| HCBD241  | 2 | Cosmopolitan | 2015 | The Philippines    | MZ520919 |
| HCBD292  | 2 | Cosmopolitan | 2016 | WPS/SEAR*          | MZ520050 |
| HCBD2106 | 2 | Cosmopolitan | 2016 | Thailand           | MZ520904 |
| HCBD2216 | 2 | Cosmopolitan | 2016 | Indonesia          | MZ520908 |
| HCBD243  | 2 | Cosmopolitan | 2016 | Indonesia          | MZ520921 |
| HCBD245  | 2 | Cosmopolitan | 2016 | India              | MZ520924 |
| HCBD247  | 2 | Cosmopolitan | 2016 | Thailand           | MZ520926 |
| HCBD289  | 2 | Cosmopolitan | 2016 | Indonesia          | MZ520928 |
| HCBD290  | 2 | Cosmopolitan | 2016 | Thailand           | MZ520929 |
| HCBD291  | 2 | Cosmopolitan | 2016 | Thailand           | MZ520930 |
| HCBD294  | 2 | Cosmopolitan | 2016 | Thailand           | MZ520931 |
| HCBD2290 | 2 | Cosmopolitan | 2017 | Sri Lanka          | MZ520913 |
| HCBD2291 | 2 | Cosmopolitan | 2017 | Mexico             | MZ520914 |
| HCBD2574 | 2 | Cosmopolitan | 2018 | WPR/SEAR*          | MZ520051 |
| HCBD2353 | 2 | Cosmopolitan | 2018 | Thailand           | MZ520916 |
| HCBD3121 | 3 | I            | 2014 | Indonesia          | MZ505710 |
| HCBD3145 | 3 | I            | 2014 | WPR/SEAR*          | MZ520119 |
| HCBD3124 | 3 | I            | 2016 | Indonesia          | MZ505713 |
| HCBD3147 | 3 | I            | 2016 | Indonesia          | MZ505724 |
| HCBD3385 | 3 | I            | 2018 | The Philippines    | MZ505716 |
| HCBD3386 | 3 | I            | 2018 | The Philippines    | MZ505717 |
| HCBD3500 | 3 | I            | 2018 | The Philippines    | MZ505719 |
| HCBD3588 | 3 | I            | 2018 | Indonesia          | MZ505723 |
| HCBD3214 | 3 | III          | 2013 | Costa Rica         | MZ505714 |
| HCBD3260 | 3 | III          | 2013 | WPR/SEAR*          | MZ520120 |
| HCBD3122 | 3 | III          | 2015 | Thailand           | MZ505711 |
| HCBD3123 | 3 | III          | 2016 | Colombia           | MZ505712 |
| HCBD3284 | 3 | III          | 2017 | Malaysia           | MZ505715 |
| HCBD3412 | 3 | III          | 2018 | India              | MZ505718 |
| HCBD3575 | 3 | III          | 2018 | The Philippines    | MZ505720 |
| HCBD3576 | 3 | III          | 2018 | India              | MZ505721 |
| HCBD3586 | 3 | III          | 2018 | Guatemala          | MZ505722 |
| HCBD3404 | 3 | III          | 2018 | WPR/SEAR*          | MZ520118 |
| HCBD4110 | 4 | I            | 2015 | Thailand           | MZ505612 |
| HCBD4108 | 4 | II           | 2015 | Thailand           | MZ505611 |
| HCBD497  | 4 | II           | 2015 | The Philippines    | MZ505614 |
| HCBD4148 | 4 | II           | 2015 | Dominican Republic | MZ505615 |
| HCBD4111 | 4 | II           | 2016 | Indonesia          | MZ505613 |

\*: For cases in which the country of acquisition dengue infection could not be ascertained, the WHO region/s visited is indicated. AMR: Region of the Americas, WPR: Western Pacific Region, SEAR: South-East Asia Region
